# Supplementary material for: Using Antigen Expression of Leukemic Cells for a Fast Screening of Acute Promyelocytic Leukemia by Flow Cytometry
Source: MDPI journal article supplement (doi:10.3390/diagnostics11111988), 2021-10-26
Supplement: s1 [file s1]

# Supplementary Materials

Supplementary Table S1. Antibody combinations used.

|   | FITC | PE   | PERPCy5.5 | PECy7 | APC   | APCH7 | V450   | V500 |
|---|------|------|-----------|-------|-------|-------|--------|------|
| 1 | CD16 | CD13 | CD34      | CD117 | CD11b | CD14  | HLA-DR | CD45 |
| 2 | CD35 | CD64 | CD34      | CD14  | CD33  | CD14  | HLADR  | CD45 |

Supplementary Table S2. Antibody clones.

| Antibody | Clone       |
|----------|-------------|
| CD16     | CLB/FcGran1 |
| CD35     | E11         |
| CD13     | WM15        |
| CD64     | 10.1        |
| CD34     | 8G12        |
| CD117    | 104D2       |
| CD11b    | ICRF44      |
| CD33     | WM53        |
| CD14     | MφP9        |
| HLA-DR   | G46-6       |
| CD45     | HI30        |

All antibodies were purchased from Becton Dickinson (BD).

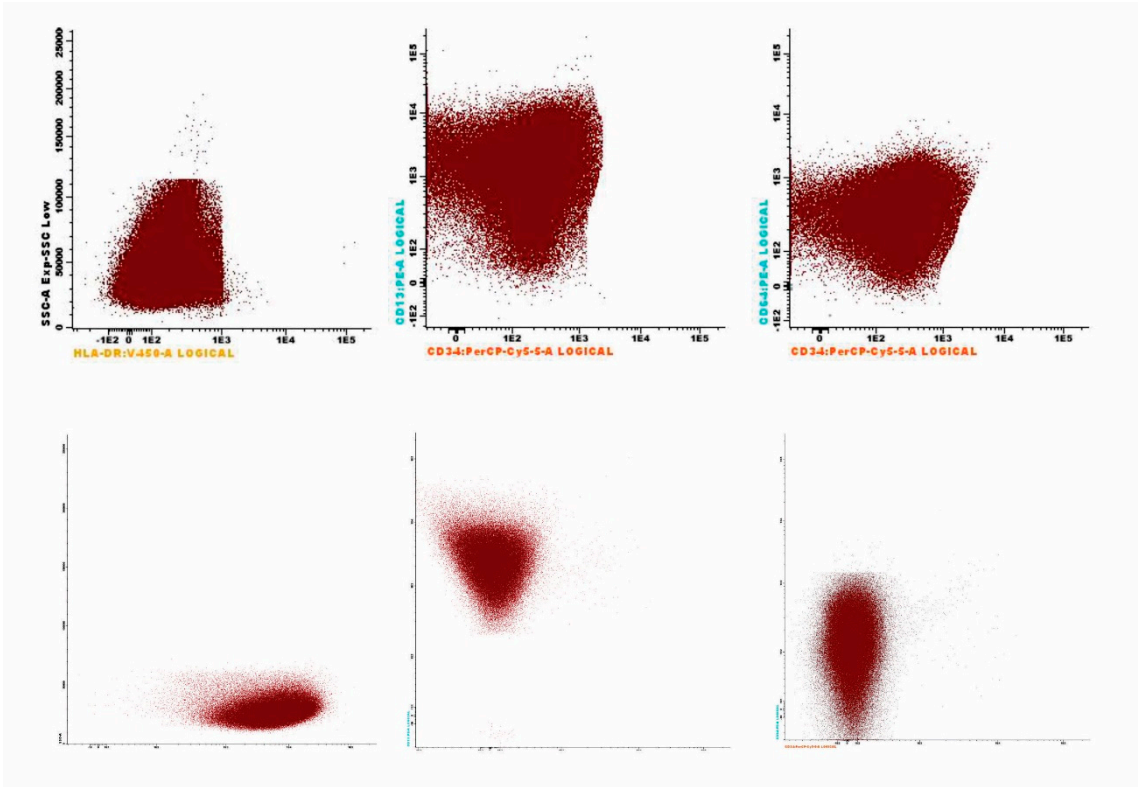

Supplementary Figure S1. Dot plots comparing the flow features discriminating APL and AML with a normal karyotype and NPM1 mutation. APL had a higher SSC, was negative for HLA-DR and CD34, and had a higher expression of CD13 and CD64.
